# Supplementary material for: Effects of stem cell transplantation on cognitive decline in animal models of Alzheimer’s disease: A systematic review and meta-analysis
Source: PubMed Central journal article supplement (PMC4498325; doi:10.1038/srep12134), 2015-07-10
Supplement: srep12134-s3.pdf [file srep12134-s3.pdf]

Effects of stem cell transplantation on cognitive decline in animal models of Alzheimer's disease: A systematic review and meta-analysis

Zhe Wang,MD, Weijun Peng,MD, Chunhu Zhang, PhD, Chenxia Sheng, PhD, Wei Huang, PhD, Yang Wang, PhD , Rong Fan, PhD

**Tables S3 Study characteristics accounting for heterogeneity**

3.1 Learning function: Stratified analysis of stem cell-treated vs. control

|                   | Number of comparisons | Number of Participants | Std.Mean difference (IV, random,95%CI) | <i>P</i> | Adjusted R <sup>2</sup> |
|-------------------|-----------------------|------------------------|----------------------------------------|----------|-------------------------|
| Pooled estimate   | 52                    | 1045                   | -1.47 [-1.74, -1.20]                   |          |                         |
| AD model          |                       |                        |                                        |          |                         |
| Transgenic        | 20                    | 472                    | -1.14 [-1.48, -0.80]                   |          |                         |
| Aβ- infused       | 15                    | 278                    | -1.97 [-2.67, -1.28]                   |          |                         |
| F-F transaction   | 4                     | 75                     | -1.98 [-2.83, -1.13]                   | 0.10     | N/A                     |
| Chem- infused     | 10                    | 168                    | -1.58 [-2.32, -0.84]                   |          |                         |
| Natural senile    | 3                     | 52                     | -1.10 [-1.70, -0.50]                   |          |                         |
| Recipient species |                       |                        |                                        |          |                         |
| TG                | 18                    | 432                    | -1.20 [-1.57, -0.82]                   |          |                         |
| Rat               | 23                    | 406                    | -2.02 [-2.59, -1.44]                   | 0.02     | 3.72%                   |
| Mouse             | 11                    | 207                    | -1.09 [-1.40, -0.77]                   |          |                         |
| Recipient sex     |                       |                        |                                        |          |                         |
| Both              | 1                     | 19                     | -1.41 [-2.44, -0.38]                   | 0.008    | N/A                     |

|                                                          |    |     |                      |      |       |
|----------------------------------------------------------|----|-----|----------------------|------|-------|
| Male                                                     | 40 | 786 | -1.71 [-2.07, -1.34] |      |       |
| Female                                                   | 2  | 36  | -1.06 [-2.05, -0.08] |      |       |
| Unclear                                                  | 9  | 204 | -0.90 [-1.19, -0.60] |      |       |
| Donor species                                            |    |     |                      |      |       |
| Human                                                    | 13 | 318 | -1.07 [-1.42, -0.73] |      |       |
| Mouse                                                    | 11 | 236 | -1.36 [-1.94, -0.77] |      |       |
| Rats                                                     | 16 | 293 | -2.24 [-2.97, -1.50] | 0.05 | N/A   |
| Cell line                                                | 12 | 198 | -1.33 [-1.82, -0.85] |      |       |
| Type of stem cells                                       |    |     |                      |      |       |
| MSCs                                                     | 22 | 480 | -1.29 [-1.66, -0.92] |      |       |
| NSCs                                                     | 22 | 427 | -1.60 [-2.07, -1.13] |      |       |
| NPCs                                                     | 6  | 87  | -2.08 [-3.23, -0.93] | 0.38 | N/A   |
| Other                                                    | 2  | 51  | -1.06 [-1.84, -0.27] |      |       |
| Number of cells injected                                 |    |     |                      |      |       |
| $>5 \times 10^5$                                         | 20 | 396 | -1.10 [-1.43, -0.76] |      |       |
| $(1-5) \times 10^5$                                      | 21 | 410 | -1.88 [-2.35, -1.40] | 0.03 | 2.66% |
| $<1 \times 10^5$                                         | 11 | 239 | -1.53 [-2.22, -0.84] |      |       |
| Type of manipulation of stem cells prior to implantation |    |     |                      |      |       |
| Gene-modification                                        | 17 | 354 | -1.46 [-1.88, -1.03] | 0.91 | N/A   |

|                   |    |     |                      |         |     |
|-------------------|----|-----|----------------------|---------|-----|
| None              | 35 | 691 | -1.49 [-1.84, -1.13] |         |     |
| Quality Scores    |    |     |                      |         |     |
| 11                | 3  | 81  | -1.05 [-1.52, -0.58] |         |     |
| 12                | 9  | 179 | -0.75 [-1.07, -0.42] |         |     |
| 13                | 15 | 259 | -1.52 [-1.94, -1.09] |         |     |
| 14                | 17 | 331 | -1.98 [-2.55, -1.41] | <0.0001 | N/A |
| 15                | 5  | 95  | -3.01 [-4.88, -1.13] |         |     |
| 16                | 2  | 60  | -0.39 [-0.95, 0.17]  |         |     |
| 18                | 1  | 40  | -0.70 [-1.34, -0.06] |         |     |
| Route of delivery |    |     |                      |         |     |
| Stereotaxic       | 42 | 820 | -1.54 [-1.87, -1.21] |         |     |
| Systemic          | 10 | 225 | -1.25 [-1.68, -0.83] | 0.30    | N/A |

Note: *P* value for test for subgroup differences. Adjusted  $R^2$  for study characteristics accounting for heterogeneity.

### 3.2 Memory capability: Stratified analysis of stem cell-treated vs. control

|                   | Number of comparisons | Number of Participants | Std. Mean difference (IV, random,95%CI) | <i>P</i> | Adjusted R <sup>2</sup> |
|-------------------|-----------------------|------------------------|-----------------------------------------|----------|-------------------------|
| Pooled estimate   | 73                    | 1495                   | 1.27 [1.04, 1.49]                       |          |                         |
| AD model          |                       |                        |                                         |          |                         |
| Transgenic        | 40                    | 906                    | 0.99 [0.73, 1.25]                       |          |                         |
| Aβ- infused       | 21                    | 381                    | 1.77 [1.33, 2.20]                       |          |                         |
| F-F transcation   | 2                     | 36                     | 4.14 [1.21, 7.06]                       | 0.01     | 28.35%                  |
| Natural senile    | 2                     | 40                     | 1.07 [0.39, 1.74]                       |          |                         |
| Chem-infused      | 8                     | 132                    | 1.04 [0.38, 1.69]                       |          |                         |
| Recipient species |                       |                        |                                         |          |                         |
| TG                | 38                    | 826                    | 0.96 [0.69, 1.24]                       |          |                         |
| Rat               | 23                    | 395                    | 1.82 [1.29, 2.35]                       | 0.007    | 16.96%                  |
| Mouse             | 12                    | 274                    | 1.43 [1.11, 1.74]                       |          |                         |
| Recipient sex     |                       |                        |                                         |          |                         |
| Both              | 2                     | 38                     | 0.30 [-0.35, 0.94]                      |          |                         |
| Male              | 56                    | 1157                   | 1.44 [1.16, 1.72]                       | 0.003    | 15.85%                  |

|                          |    |     |                    |       |        |
|--------------------------|----|-----|--------------------|-------|--------|
| Female                   | 2  | 270 | 0.93 [0.66, 1.20]  |       |        |
| Unclear                  | 13 | 30  | 0.70 [-0.05, 1.45] |       |        |
| Donor species            |    |     |                    |       |        |
| Mouse                    | 26 | 546 | 0.88 [0.54, 1.22]  |       |        |
| Human                    | 23 | 564 | 1.21 [0.93, 1.48]  | 0.004 | 26.22% |
| Rat                      | 15 | 254 | 2.50 [1.70, 3.30]  |       |        |
| Cell line                | 9  | 131 | 1.16 [0.57, 1.75]  |       |        |
| Type of stem cells       |    |     |                    |       |        |
| MSCs                     | 41 | 880 | 1.13 [0.89, 1.37]  | 0.38  | N/A    |
| NSCs                     | 23 | 481 | 1.34 [0.92, 1.77]  |       |        |
| NPCs                     | 9  | 134 | 2.24 [0.96, 3.52]  |       |        |
| Number of cells injected |    |     |                    |       |        |
| >5×10 <sup>5</sup>       | 34 | 695 | 0.91 [0.70, 1.11]  | 0.008 | 14.63% |
| (1-5) ×10 <sup>5</sup>   | 25 | 494 | 1.81 [1.37, 2.26]  |       |        |
| <1×10 <sup>5</sup>       | 14 | 306 | 1.49 [0.79, 2.18]  |       |        |
| Quality Scores           |    |     |                    |       |        |
| 11                       | 3  | 74  | 1.22 [0.53, 1.92]  | 0.004 | N/A    |
| 12                       | 12 | 238 | 0.70 [0.43, 0.96]  |       |        |
| 13                       | 26 | 481 | 1.31 [0.97, 1.65]  |       |        |
| 14                       | 18 | 348 | 1.98 [1.37, 2.59]  |       |        |

---

|                                                          |                   |    |      |                   |      |     |
|----------------------------------------------------------|-------------------|----|------|-------------------|------|-----|
|                                                          | 15                | 8  | 154  | 1.16 [0.23, 2.08] |      |     |
|                                                          | 16                | 4  | 120  | 0.96 [0.00, 1.92] |      |     |
|                                                          | 18                | 2  | 80   | 1.46 [0.76, 2.15] |      |     |
| Type of manipulation of stem cells prior to implantation |                   |    |      |                   |      |     |
|                                                          | Gene-modification | 26 | 586  | 1.16 [0.88, 1.44] |      |     |
|                                                          | None              | 47 | 909  | 1.36 [1.04, 1.68] | 0.36 | N/A |
| Route of delivery                                        |                   |    |      |                   |      |     |
|                                                          | Stereotaxic       | 53 | 1041 | 1.31 [1.01, 1.60] |      |     |
|                                                          | Systemic          | 20 | 454  | 1.26 [1.01, 1.50] | 0.80 | N/A |

Note: *P* value for test for subgroup differences. Adjusted  $R^2$  for study characteristics accounting for heterogeneity.
